# Supplementary material for: Prediction of radon-silica systems in the Earth's mantle
Source: Royal Society of Chemistry journal article supplement (doi:10.1039/d5cp04681e), 2026-01-01
Supplement: d5cp04681e2.pdf [file d5cp04681e2.pdf]

## **Supplementary information for Prediction of radon-silica systems in the Earth's mantle**

Kai Hu<sup>1</sup>, Yixing Geng<sup>3</sup>, Yanying Zhao<sup>3</sup>, Yuqiu Gu<sup>4,\*</sup>, Jinqing Yu<sup>2,\*</sup>, and

Xueqing Yan<sup>3,5,6,\*</sup>

*1 School of Mathematics and Physics, Nanjing Institute of technology,  
Nanjing 211167, China*

*2 Hunan Provincial Key Laboratory of High-Energy Scale Physics and  
Applications, School of Physics and Electronics, Hunan University,  
Changsha 410082, China*

*3 State Key Laboratory of Nuclear Physics and Technology, and Key  
Laboratory of HEDP of the Ministry of Education, CAPT, Peking  
University, Beijing 100871, China*

*4 Shanghai Institute of Laser Plasma, Shanghai 201800, China*

*5 Collaborative Innovation Center of Extreme Optics, Shanxi University,  
Taiyuan, Shanxi 030006, China*

*6 Guangdong Laser Plasma Institute, Guangzhou 510540, China*

*E-mail: \*yqgu@caep.cn; \*jinqing.yu@hnu.edu.cn; \*x.yan@pku.edu.cn*

We tested the standard PBE functional and PBE with DFT-D3 dispersion correction, as shown in Figure S1. We calculated the electronic density of states for the  $Fd-3m$  and  $P4_1$  structures, as shown in Figure S2. The Rn- $p$

electrons mainly contribute to states around the Fermi level. The PBE functional underestimates the band gaps of semiconductors and insulators. Therefore, we used a hybrid functional with dispersion corrections to calculate the electronic band structure, resulting in a more accurate band gap, as shown in Figure S3. Detailed elastic constants and stiffness tensor  $C_{ij}$  are presented in Table S1 and S2.

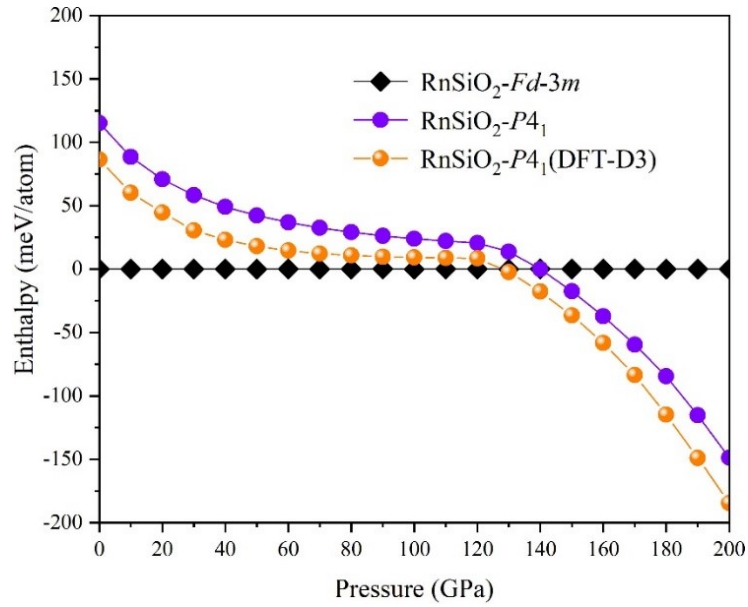

**Figure S1.** The dispersion corrected relative enthalpy of the *Fd*-3*m* and *P4*<sub>1</sub> phases.

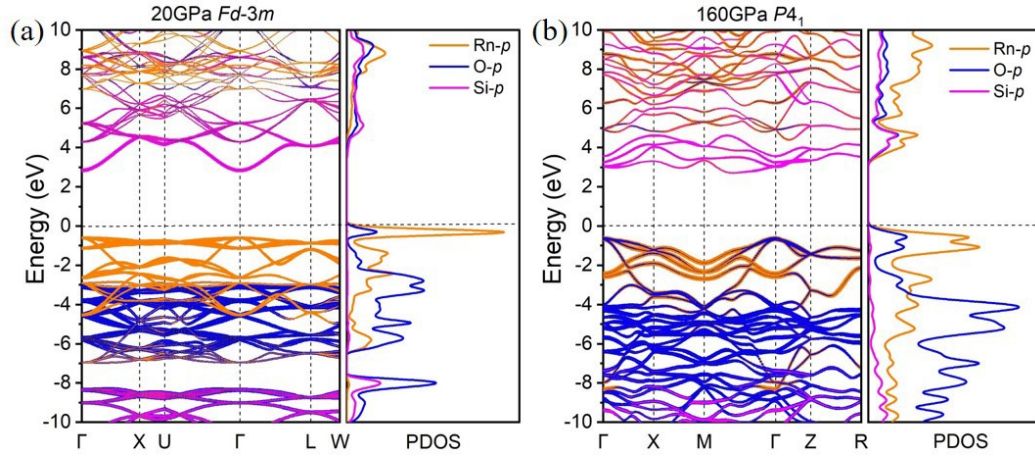

**Figure S2.** Electronic band structure and corresponding PDOS for (a) the  $Fd-3m$  phase at 20 GPa, and (b) the  $P4_1$  phase at 160 GPa. The Rn- $p$ , O- $p$ , and Si- $p$  electrons are drawn in orange, blue, and pink, respectively.

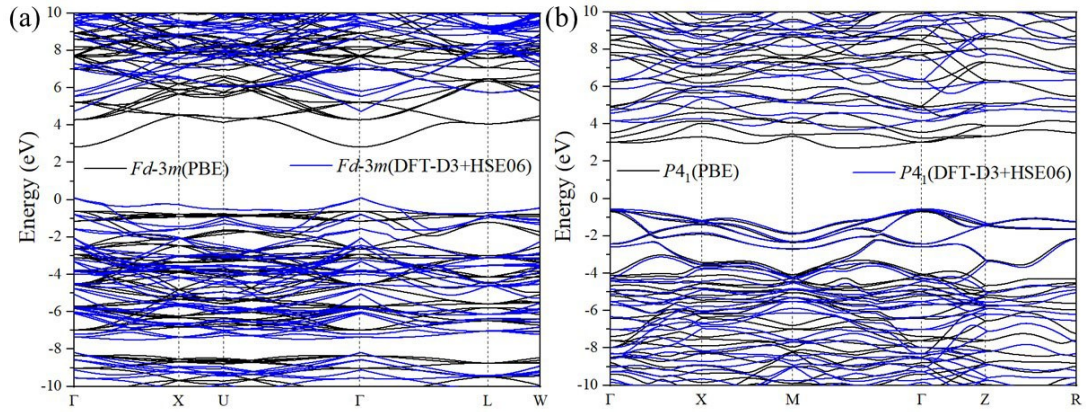

**Figure S3.** Calculated phonon band structures of (a) the  $Fd-3m$  phase with PBE and DFT-D3+HSE06 at 20 GPa, and (b) the  $P4_1$  phase with PBE and DFT-D3+HSE06 at 160 GPa.

**Table S1. Three independent elastic constants and stiffness tensor  $C_{ij}$  of the  $Fd-3m$  phase.**

| Elastic Constants:                  |         |         |         |         |         |
|-------------------------------------|---------|---------|---------|---------|---------|
| C11                                 | C12     | C12     | 0       | 0       | 0       |
| C12                                 | C11     | C12     | 0       | 0       | 0       |
| C12                                 | C12     | C11     | 0       | 0       | 0       |
| 0                                   | 0       | 0       | C44     | 0       | 0       |
| 0                                   | 0       | 0       | 0       | C44     | 0       |
| 0                                   | 0       | 0       | 0       | 0       | C44     |
| Stiffness Tensor $C_{ij}$ (in GPa): |         |         |         |         |         |
| 305.530                             | 142.815 | 142.815 | 0.000   | 0.000   | 0.000   |
| 142.815                             | 305.530 | 142.815 | 0.000   | 0.000   | 0.000   |
| 142.815                             | 142.815 | 305.530 | 0.000   | 0.000   | 0.000   |
| 0.000                               | 0.000   | 0.000   | 104.363 | 0.000   | 0.000   |
| 0.000                               | 0.000   | 0.000   | 0.000   | 104.363 | 0.000   |
| 0.000                               | 0.000   | 0.000   | 0.000   | 0.000   | 104.363 |

**Table S2. Seven independent elastic constants and stiffness tensor  $C_{ij}$  of the  $P4_1$  phase.**

| Elastic Constants:                  |         |         |         |         |         |
|-------------------------------------|---------|---------|---------|---------|---------|
| C11                                 | C12     | C13     | 0       | 0       | C16     |
| C12                                 | C11     | C13     | 0       | 0       | -C16    |
| C13                                 | C13     | C33     | 0       | 0       | 0       |
| 0                                   | 0       | 0       | C44     | 0       | 0       |
| 0                                   | 0       | 0       | 0       | C44     | 0       |
| C16                                 | -C16    | 0       | 0       | 0       | C66     |
| Stiffness Tensor $C_{ij}$ (in GPa): |         |         |         |         |         |
| 540.643                             | 186.429 | 338.811 | 0.000   | 0.000   | -19.991 |
| 186.429                             | 540.643 | 338.811 | 0.000   | 0.000   | 19.991  |
| 338.811                             | 338.811 | 552.326 | 0.000   | 0.000   | -0.000  |
| 0.000                               | 0.000   | 0.000   | 226.154 | 0.000   | 0.000   |
| 0.000                               | 0.000   | 0.000   | 0.000   | 226.154 | 0.000   |
| -19.991                             | 19.991  | -0.000  | 0.000   | 0.000   | 128.937 |
